# Supplementary material for: Bangla version of the Brunel Mood Scale (BRUMS): validity, measurement invariance and normative data in non-clinical sample
Source: PubMed Central journal article supplement — Heliyon. 2022 Jun 9;8(6):e09666. doi: 10.1016/j.heliyon.2022.e09666 (PMC9207613; doi:10.1016/j.heliyon.2022.e09666), 2022-06-09
Supplement: mmc1.pdf [file mmc1.pdf]

## Bangla version of the Brunel Mood Scale (BRUMS)

নিচে আমাদের সাধারণ কিছু অনুভূতি উল্লেখ করা হলো। আপনি “সাধারণত কেমন বোধ করেন” তা নিচের অপশনগুলোর মাধ্যমে প্রকাশ করুন।

|     |                            | মোটাই না | কিছুটা | মোটামুটি | বেশ অনেকটা | চরম মাত্রায় |
|-----|----------------------------|----------|--------|----------|------------|--------------|
| ১.  | আতঙ্কিত (Panicky)          | ০        | ১      | ২        | ৩          | ৪            |
| ২.  | প্রাণবন্ত (Lively)         | ০        | ১      | ২        | ৩          | ৪            |
| ৩.  | দ্বিধাযিত (Confused)       | ০        | ১      | ২        | ৩          | ৪            |
| ৪.  | পরিশ্রান্ত (Worn out)      | ০        | ১      | ২        | ৩          | ৪            |
| ৫.  | বিষণ্ন (Depressed)         | ০        | ১      | ২        | ৩          | ৪            |
| ৬.  | মনমরা (Downhearted)        | ০        | ১      | ২        | ৩          | ৪            |
| ৭.  | বিরক্ত (Annoyed)           | ০        | ১      | ২        | ৩          | ৪            |
| ৮.  | চরম ক্লান্ত (Exhausted)    | ০        | ১      | ২        | ৩          | ৪            |
| ৯.  | হতবুদ্ধি (Mixed-up)        | ০        | ১      | ২        | ৩          | ৪            |
| ১০. | ঘুম ঘুম (Sleepy)           | ০        | ১      | ২        | ৩          | ৪            |
| ১১. | উগ্র (Bitter)              | ০        | ১      | ২        | ৩          | ৪            |
| ১২. | অসুখী (Unhappy)            | ০        | ১      | ২        | ৩          | ৪            |
| ১৩. | উদ্বিগ্ন (Anxious)         | ০        | ১      | ২        | ৩          | ৪            |
| ১৪. | দুশ্চিন্তাগ্রস্ত (Worried) | ০        | ১      | ২        | ৩          | ৪            |
| ১৫. | উদ্যমী (Energetic)         | ০        | ১      | ২        | ৩          | ৪            |
| ১৬. | দুর্দশাগ্রস্ত (Miserable)  | ০        | ১      | ২        | ৩          | ৪            |
| ১৭. | বিশৃঙ্খল (Muddled)         | ০        | ১      | ২        | ৩          | ৪            |
| ১৮. | ভীত (Nervous)              | ০        | ১      | ২        | ৩          | ৪            |
| ১৯. | রাগান্বিত (Angry)          | ০        | ১      | ২        | ৩          | ৪            |
| ২০. | কর্মঠ (Active)             | ০        | ১      | ২        | ৩          | ৪            |
| ২১. | ক্লান্ত (Tired)            | ০        | ১      | ২        | ৩          | ৪            |
| ২২. | বদ মেজাজ (Bad tempered)    | ০        | ১      | ২        | ৩          | ৪            |
| ২৩. | কর্মতৎপর (Alert)           | ০        | ১      | ২        | ৩          | ৪            |
| ২৪. | অনিশ্চিত (Uncertain)       | ০        | ১      | ২        | ৩          | ৪            |
